# Supplementary material for: A hypothesis concerning distinct schemes of olfactory activation evoked by perceived versus nonperceived input
Source: PubMed Central journal article supplement — Proc Natl Acad Sci U S A. 2022 Mar 1;119(10):e2120093119. doi: 10.1073/pnas.2120093119 (PMC8915958; doi:10.1073/pnas.2120093119), 2022-03-01
Supplement: pnas.2120093119.sapp.pdf [file pnas.2120093119.sapp.pdf]

## Supporting information: 4 simulation figures and extended methods

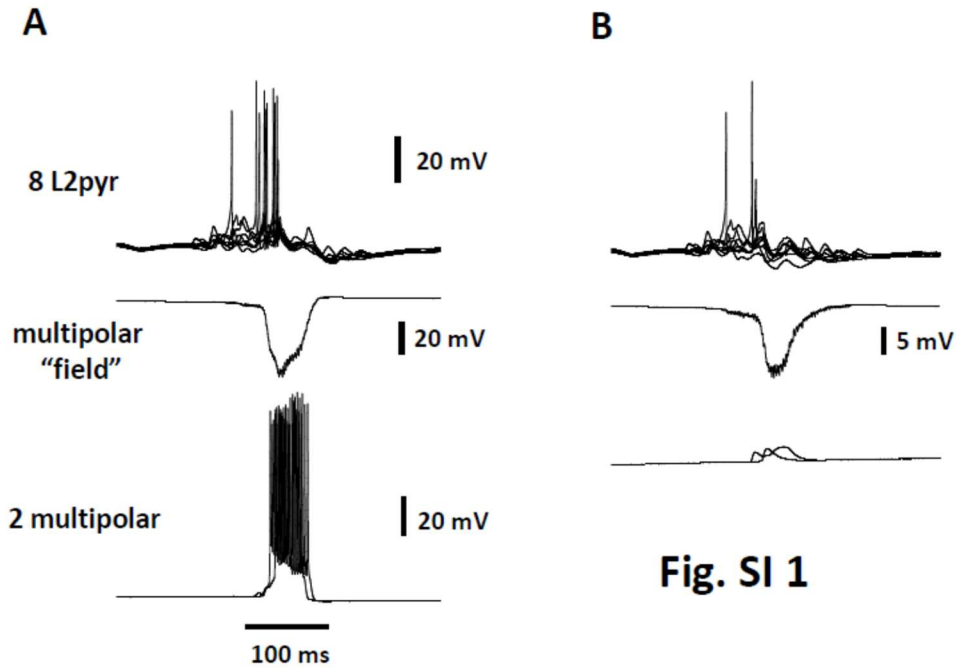

**Fig. SI 1**

**Fig. SI 1.** A threshold strength of persistent  $g_{Na}$  in multipolar neurons suffices for model endopiriform collective bursting and amplification of L2pyr activity. Parameters in these simulations were as in Fig. 3, but with multipolar  $g_{Na(P)}$  density  $0.25 \times$  transient  $g_{Na}$  density (in A), and  $0.1 \times$  transient  $g_{Na}$  density (in B). Note the profound difference in activities. Simulations piriformENDO105,106.

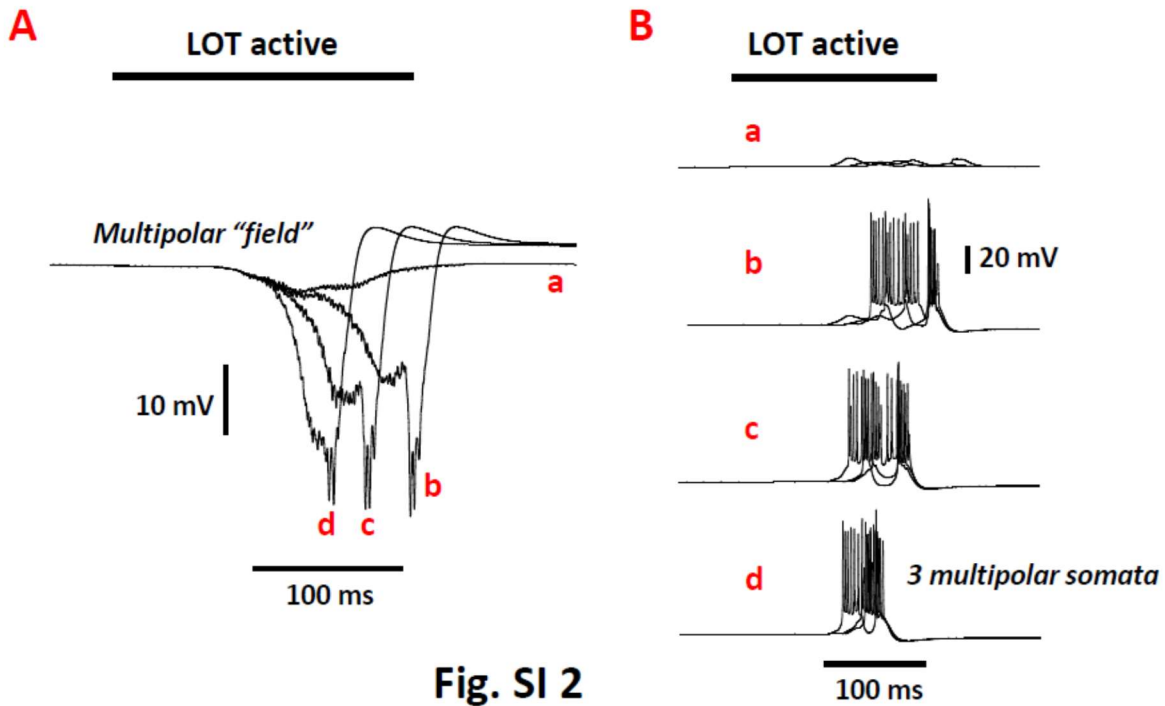

**Fig. SI 2**

**Fig. SI 2.** With a fixed density of multipolar synaptic interconnections (above the percolation limit), a critical strength of multipolar recurrent synaptic excitation is necessary for collective bursting. In each of the 4 simulations illustrated, all LOT afferents were active for 200 ms with mean interval between spikes = 300 ms. Each multipolar neuron contacted 12 others, chosen randomly. **a:**  $g_{AMPA}$  scaling = 0.75; **b:** 0.80; **c:** 0.85; **d:** 1.5. **A:** the multipolar "fields" (inverted average of multipolar somatic potentials, for the multipolar populations). **B:** somatic potentials of 3 multipolar neurons. Note the sharp transition between **a** and **b**, and the shortening latency as  $g_{AMPA}$  is further increased. Simulations piriformENDO41,43,42,39.

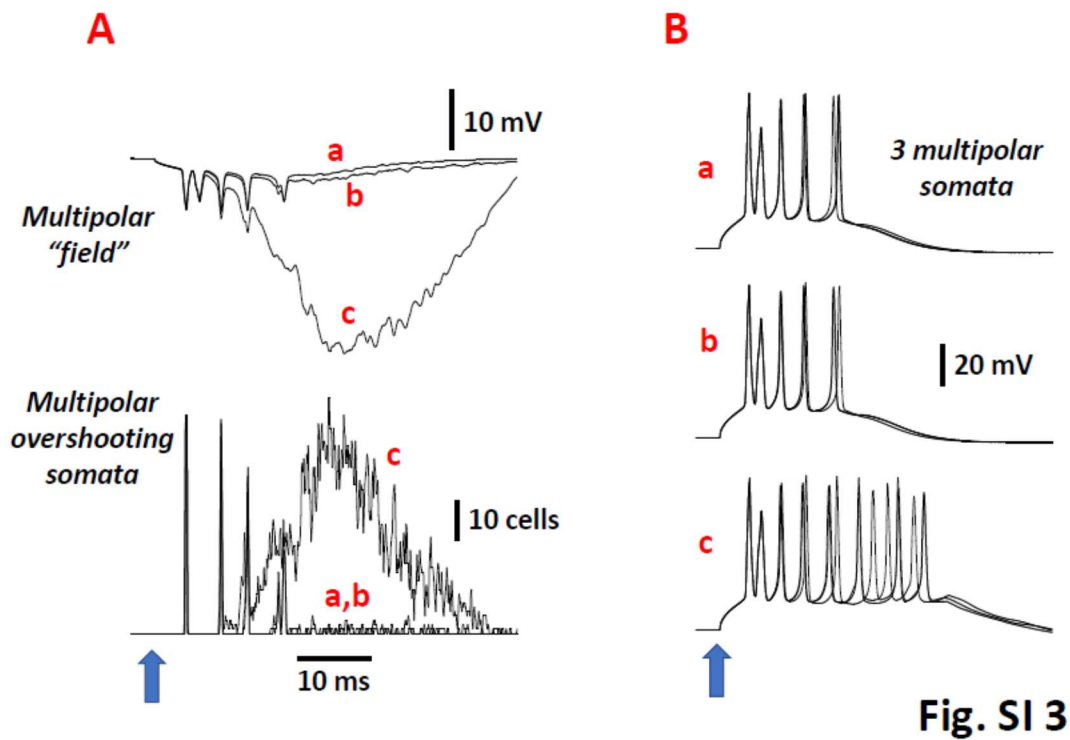

**Fig. SI 3**

**Fig. SI 3.** Further demonstration of the importance of  $g_{AMPA}$  (multipolar→multipolar) scaling for collective bursting. In these 3 simulations, afferents were silent and a 5 ms, 0.6 nA depolarizing somatic current pulse was delivered to 50 multipolar neurons (arrows). **a:** each multipolar cell contacts 8 others,  $g_{AMPA}$  scaling 0.6; **b:** each multipolar cell contacts 12 others,  $g_{AMPA}$  scaling 0.6; **c:** each multipolar cell contacts 12 others,  $g_{AMPA}$  scaling 1.5: sustained firing now occurs. Simulations piriformENDO65,66,67.

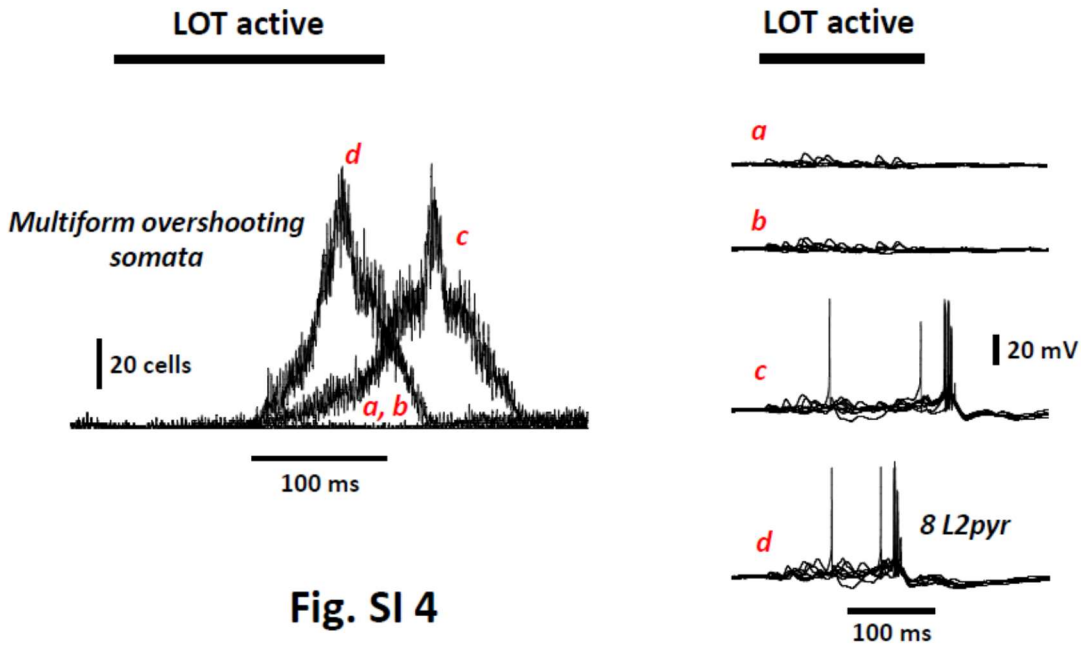

**Fig. SI 4.** *Critical collective behavior of the multipolar (endopiriform) population as a function of afferent intensity, with consequent effects on the L2pyr population.* This figure extends Fig. 4 of the main text, although here bias currents to the multipolar neurons are different (Fig. 4: -0.25 nA, Fig. SI 4: -0.05 nA). In this figure, each model multipolar neuron contacts 3 others with scaling factor  $g_{\text{AMPA}}$  (multipolar  $\rightarrow$  multipolar) = 0.6. The density of persistent  $g_{\text{Na}}$  was  $0.5 \times$  transient  $g_{\text{Na}}$ , as in Fig. 4. In each of the 4 simulations illustrated here, LOT afferents were active for 200 ms. **a**: mean interval between spikes in each LOT axon = 800 ms; **b**: 600 ms; **c**: 550 ms; **d**: 500 ms. Note the transition between **b** and **c** and the associated switch in L2pyr activities.

## Detailed formulation of the (endopiriform) multipolar cell model.

Note that the programs for modeling all of the other cell types have a similar logical structure to this one, although cell architecture, conductance densities, and possibly membrane kinetics will vary from cell type to cell type. This model is a descendant of the one described in Ref. (1).

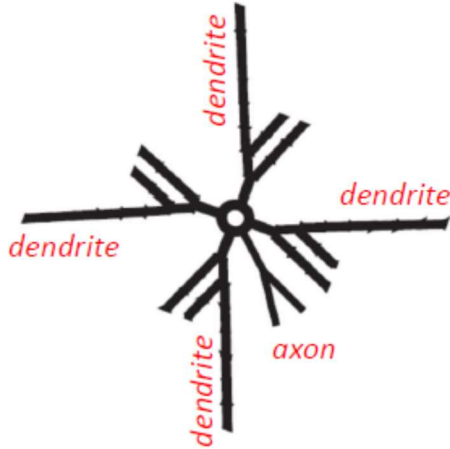

**Fig. SI 5.** Schematic of the multipolar cell architecture (not to scale). There are 59 compartments, 1 for the soma, 6 for the branching axon, 13 for each of the branching dendrites.

The endopiriform multipolar neuron has a compartmental structure as shown in Fig. SI 5. All compartments are cylindrical. The model was based on an earlier basket cell model, with soma dimensions in microns: radius 7.5, length 20; axon compartmental dimensions = radius 0.8 tapering to 0.5, length 50; dendritic compartmental dimensions = radius 1.06 tapering to 0.42, length 40. To convert this structure to a multipolar cell, the dendritic compartments were doubled in length, then doubled in area (to account for spines).

A consistent set of units for the model consists of mV, ms (or  $\text{ms}^{-1}$  for rate functions), nF, nA,  $\mu\text{S}$ .

We simulated electrical and calcium-mediated activity with the standard discrete compartmental cable equation (2). Electrotonic parameters were membrane capacitance density  $0.9 \mu\text{F}/\text{cm}^2$ , membrane resistivity  $R_m = 50,000 \Omega\text{-cm}^2$  for soma/dendrites and  $1,000 \Omega\text{-cm}^2$  for the axon, internal resistivity  $R_i = 250 \Omega\text{-cm}$  for soma/dendrites and  $100 \Omega\text{-cm}$  for the axon. Synaptic and leak conductances are taken to be ohmic, with reversal potentials in mV: leak -65,  $\text{K}^+$  (and  $\text{GABA}_B$ ) -85,  $\text{Na}^+$  50,  $\text{Ca}^{2+}$  125, anomalous rectifier (h-current) -40, AMPA and NMDA 0,  $\text{GABA}_A$  -75.

As per usual, for compartment  $k$ ,

$$C_k dV_k / dt = \sum_m \gamma_{m,k} (V_m - V_k) - I_{\text{ionic},k}$$

where  $C_k$  is the membrane capacitance of compartment  $k$ , the  $V$ 's are transmembrane potentials of various compartments (and the extracellular space is assumed isopotential), the sum is taken over all compartments directly connected to compartment  $k$ , and  $I_{\text{ionic}, k}$  is the ionic transmembrane current for the respective compartment. This latter term includes the leak, synaptic currents, and active transmembrane currents.

Active transmembrane currents included these: transient  $g_{\text{Na}}$ , persistent  $g_{\text{Na}}$ , 5 types of  $g_{\text{K}}$ , 2 types of  $g_{\text{Ca}}$ , and the anomalous rectifier. The  $g_{\text{K}}$  types were  $g_{\text{K(DR)}}$ , the delayed rectifier;  $g_{\text{K(A)}}$  (“A” current);  $g_{\text{K(M)}}$  (“M” current);  $g_{\text{K(C)}}$  (“C” current), and  $g_{\text{K(AHP)}}$  (slow afterhyperpolarization). The  $g_{\text{Ca}}$  types were  $g_{\text{Ca(L)}}$  (high-threshold) and  $g_{\text{Ca(T)}}$  (low-threshold “T” type). Membrane kinetics for all channel types except  $g_{\text{K(AHP)}}$  depended on transmembrane voltage.  $g_{\text{K(C)}}$  depended on  $[\text{Ca}^{2+}]_i$  as well; and  $g_{\text{K(AHP)}}$  depended on  $[\text{Ca}^{2+}]_i$  but not on voltage.

The voltage-dependent kinetics of the different transmembrane currents were simulated with a standard Hodgkin-Huxley type of scheme, where there are activation (“ $m$ ”) and possibly inactivation (“ $h$ ”) state variables, specific to each conductance type, having kinetics that depend on membrane voltage only. The conductance in a given compartment depends on a scaling constant, say  $g_{\text{K(A)}}$  (dropping the compartmental subscript “ $k$ ”), multiplied by powers of “ $m$ ” and “ $h$ ” for that conductance and that compartment. The state variables each evolve according to the differential equations:

$$dm / dt = \alpha_m \times (1 - m) - \beta_m \times m ; \quad dh / dt = \alpha_h \times (1 - h) - \beta_h \times h$$

The  $\alpha$ 's and  $\beta$ 's are designated the forward and backward rate functions, respectively; they are functions of transmembrane voltage and of course have different properties for each conductance type. An equivalent formulation of these kinetics uses the relations of the sort:

$$m_{\infty}(V) = \alpha_m(V) / [\alpha_m(V) + \beta_m(V)] ; \quad \tau_m(V) = 1 / [\alpha_m(V) + \beta_m(V)] ,$$

(likewise for  $h_{\infty}$  and  $\tau_h$ ). Here,  $m_{\infty}$  is the steady-state value that  $m$  would obtain if  $V$  were held constant, and  $\tau_m$  is the respective time constant. (It is easy to show that these numbers are well-defined). Hence, kinetic properties can be defined by the rate functions (of voltage), or by steady-state values and time constants. We use both formulations below.

Hence (dropping compartmental subscripts), the ionic current depending on membrane channels (excluding synaptic currents), and using “ $g$ ” parameters as scaling constants and using a consistent set of units, will be:

$$\begin{aligned} &g_L (V + 65) + [g_{\text{Na(F)}} m_{\text{Na(F)}}^3 h_{\text{Na(F)}} + g_{\text{Na(P)}} m_{\text{Na(P)}}^3] (V - 50) + \\ &[g_{\text{K(DR)}} m_{\text{K(DR)}}^4 + g_{\text{K(A)}} m_{\text{K(A)}}^4 h_{\text{K(A)}} + g_{\text{K(M)}} m_{\text{K(M)}} + g_{\text{K(C)}} m_{\text{K(C)}} \Gamma(\chi) + \\ &g_{\text{K(AHP)}} m_{\text{K(AHP)}}] (V + 85) + [g_{\text{Ca(L)}} m_{\text{Ca(L)}}^2 + g_{\text{Ca(T)}} m_{\text{Ca(T)}}^2 h_{\text{Ca(T)}}] (V - 125) + \\ &+ g_{\text{AR}} m_{\text{AR}} (V + 40) \end{aligned}$$

In the above equation,  $\chi$  stands for  $[\text{Ca}^{2+}]_i$  in the respective compartment, and  $\Gamma$  a function thereof, to be defined below.

**Kinetics of voltage-dependent membrane conductances** are as follows:

*Transient  $g_{Na}$ :*  $m_{\infty} = 1 / [1 + \exp((-V - 38) / 10)];$

$$\begin{aligned}\tau_m &= 0.0125 + 0.1525 \exp((V + 30)/10) \text{ if } V < 30 \text{ mV} \\ &= 0.02 + 0.145 \exp((-V-30)/10) \text{ otherwise.}\end{aligned}$$

$$h_{\infty} = 1 / [1 + \exp ((V + 58.3)/6.7)]$$

$$\tau_h = 0.225 + 1.125 / [1 + \exp(V + 37)/15)]$$

*Persistent  $g_{Na}$ :* activation kinetics as above (but for other principal cell types, there may be shifts along the voltage axis); there is no inactivation.

*Delayed rectifier:*  $m_{\infty} = 1 / [1 + \exp((-V - 27) / 11.5)];$

$$\begin{aligned}\tau_m &= 0.25 + 4.35 \exp((V + 10)/10) \text{ if } V < -10 \text{ mV} \\ &= 0.25 + 4.35 \exp((-V-10)/10) \text{ otherwise.}\end{aligned}$$

*A current:*  $m_{\infty} = 1 / [1 + \exp((-V - 60) / 8.5)];$

$$\tau_m = 0.185 + 0.5 / [ \exp((V + 35.8)/19.7) + \exp((-V-79.7)/12.7)]$$

$$h_{\infty} = 1 / [1 + \exp ((V + 78.0)/6.0)]$$

$$\begin{aligned}\tau_h &= 0.5 / [\exp((V + 46)/5) + \exp((-V-238)/37.5)] \text{ if } V < -63 \text{ mV} \\ &= 9.5 \text{ otherwise.}\end{aligned}$$

*Anomalous rectifier:*  $m_{\infty} = 1 / [1 + \exp((V + 75) / 5.5)];$

$$\tau_m = 1 / [\exp(-14.6 - 0.086 V) + \exp(-1.87 + 0.07 V)]$$

*C current (voltage-dependent part):* if  $V < -10$  mV then

$$\alpha_m = 0.106 \exp ((V + 50)/11 - (V + 53.5)/27)$$

$$\beta_m = 4 \exp ((-V - 53.5)/27) - \alpha_m ; \text{ otherwise}$$

$$\alpha_m = 4 \exp((-V - 53.5)/27) \text{ and } \beta_m = 0$$

*M current:*  $\alpha_m = 0.02 / [1 + \exp((-V - 20)/5)]$

$$\beta_m = 0.01 \exp((-V - 43)/18)$$

*High-threshold  $g_{Ca}$  ( $g_{Ca(L)}$ ):*  $\alpha_m = 1.6 / [1 + \exp(-0.072 (V - 5))]$

$$\beta_m = 0.1 ((V + 8.9)/5) / [\exp(V + 8.9)/5) - 1]$$

*Low-threshold  $g_{Ca}$  ( $g_{Ca(T)}$ ):*  $m_{\infty} = 1 / [1 + \exp((-V - 52)/7.4)]$

$$\tau_{m-} = 1 + 0.33 / [\exp((V + 27)/10) + \exp((-V-102)/15)]$$

$$h_{\infty} = 1 / [1 + \exp((V + 80)/5)]$$

$$\tau_h = 28.3 + 0.33 / [\exp((V + 48)/4) + \exp((-V - 407)/50)]$$

**Scaling factors for membrane conductances (as in multipolar.f).** These are given in units of mS/cm<sup>2</sup>.

*Transient g<sub>Na</sub>*: 400 (axon), 60 (soma and proximal dendrites), 30 → 10 (rest of the dendrites)

*Persistent g<sub>Na</sub>*: Varies, depending on the simulation

*Delayed rectifier*: 400 (axon), 100 (soma and proximal dendrites), 20 (rest of the dendrites)

*A current*: 1 (axon), 2 (soma), 1 (dendrites)

*AHP current (slow, gated by Ca<sup>2+</sup>)*: 0 (axon), 0.12 (soma and dendrites)

*Anomalous rectifier*: 0 (axon), 0.02 (soma and dendrites)

*C current*: 10 (soma), 0 elsewhere

*M current*: 8 (axon), 6 (soma and dendrites)

*High-threshold g<sub>Ca</sub> (g<sub>Ca(L)</sub>)*: 0 (axon), 0.5 (soma and proximal dendrites), 2.5 (distal dendrites)

*Low-threshold g<sub>Ca</sub> (g<sub>Ca(T)</sub>)*: 0 (axon), 0.05 (soma and proximal dendrites), 0.5 (distal dendrites)

**[Ca<sup>2+</sup>]<sub>i</sub> dynamics and slow AHP conductance.** [Ca<sup>2+</sup>]<sub>i</sub> (denoted “chi” in the code, and “χ” here) rises with Ca<sup>2+</sup> current through high-threshold (g<sub>Ca(L)</sub>) channels, into a thin cylindrical shell in each soma-dendritic compartment. For each soma-dendritic compartment, a parameter “cafor” is defined as  $52 \times 10^6 / [\text{compartment area in microns}^2]$  (respectively  $26 \times 10^6 / [\text{compartment area in microns}^2]$  for the soma). For compartment k, then,

$$d\chi_k / dt = \text{“cafor”} \times [\text{high-threshold inward } I_{Ca} \text{ in nA for compartment } k] - \beta_\chi \times \chi_k$$

The relaxation parameters β<sub>χ</sub> are 0.05 for dendrites and 0.02 for the soma, corresponding to decay time constants of 20 ms and 50 ms, respectively. Note the model does not include Ca<sup>2+</sup> currents in the axon.

The quantities χ<sub>k</sub> are coupled to K<sup>+</sup> currents as follows. First, for g<sub>K(C)</sub>, the term Γ(χ), which appears in the equation for total ionic current, is equal to min(1, 0.004 × χ). (This formulation allows for saturation, in case χ becomes very large, as it can do during plateau potentials.) Second, for g<sub>K(AHP)</sub>, the forward rate function in compartment k is α<sub>m</sub> = min(2 × 10<sup>-5</sup> × χ<sub>k</sub>, 0.01), again allowing for saturation. The backward rate function is constant at 0.001, corresponding to relaxation with time constant 1 second.

**Formalism for major synaptic conductances.** The major synaptic conductances developing across multipolar cell membranes are mediated by AMPA and GABA<sub>A</sub> receptors, excitatory and inhibitory respectively. A unitary AMPA conductance follows an alpha function and is equal to g<sub>AMPA</sub> t exp(-t / τ), where τ g<sub>AMPA</sub> is a scaling constant that depends on the presynaptic cell type, and which varies with the simulation, t is time in ms, and τ is a time constant in ms (in this case,



2 ms). A unitary GABA<sub>A</sub> conductance also has a scaling constant, rises in one integration time step, and decays exponentially: for multipolar neurons, the decay time constant is 6 ms.

**Connectivity of multipolar neurons.** The endopiriform cells synaptically contact each other, and they send output to, and receive input from: piriform layer 2 pyramids, layer 3 pyramids, and deep basket (fast-spiking) cells. A deep basket cell is excited by 10 randomly chosen multipolars with  $g_{\text{AMPA}}$  scaling 0.5; a multipolar cell is inhibited by 15 deep basket cells, with  $g_{\text{GABA(A)}}$  scaling 1.0. The other connectivity parameters were varied in different simulations.

### References for Supporting Information

- 1) R.D. Traub, E.H. Buhl, T. Gloveli, M.A. Whittington, M.A., Fast rhythmic bursting can be induced in layer 2/3 cortical neurons by enhancing persistent Na<sup>+</sup> conductance or by blocking BK channels. *J. Neurophysiol.* **89**, 909-921 (2003).
- 2) F.A. Dodge, J.W. Cooley, Action potential of the motoneuron. *IBM J. Res. Dev.* **17**, 219-229 (1973).
